# Supplementary figures and images for: A new no-report paradigm reveals that face cells encode both consciously perceived and suppressed stimuli
Source: eLife journal article supplement (doi:10.7554/elife.58360), 2020-11-11

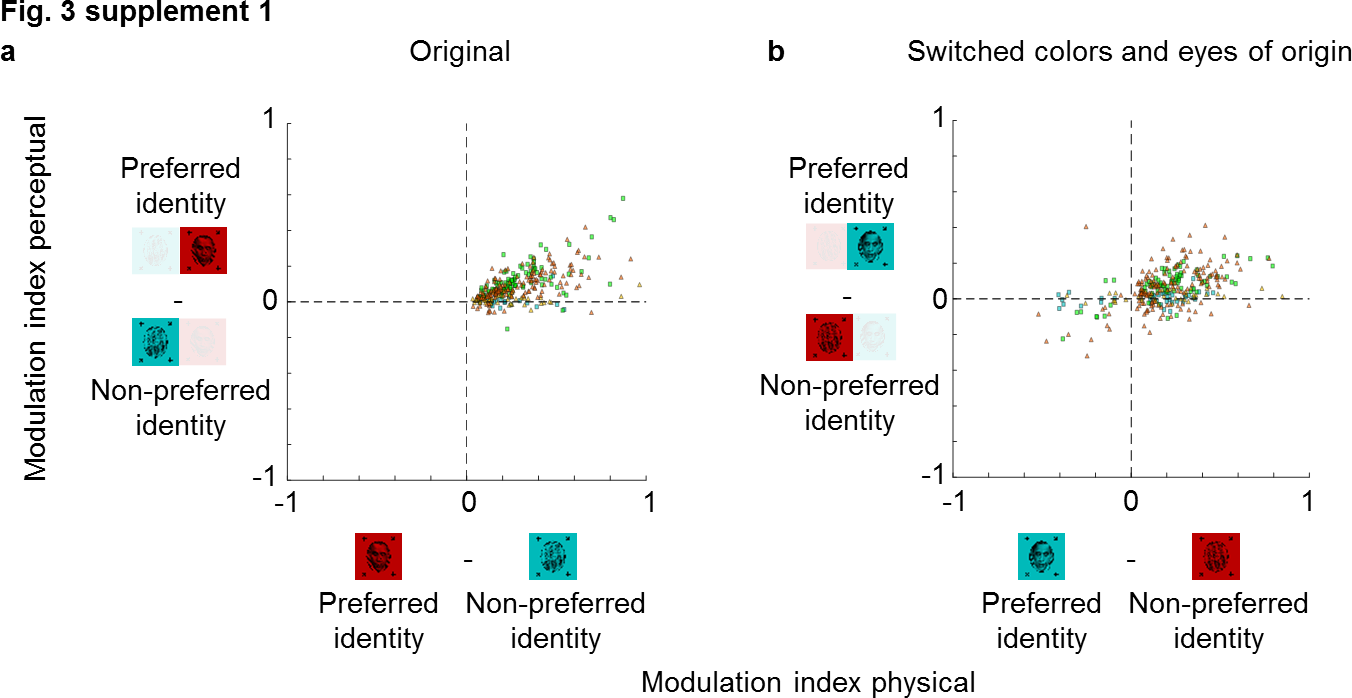

Supplement: supp [file elife-58360-supp-v1.zip › elife_poa_e58360_Figure_3_figure_supplement_1.png]

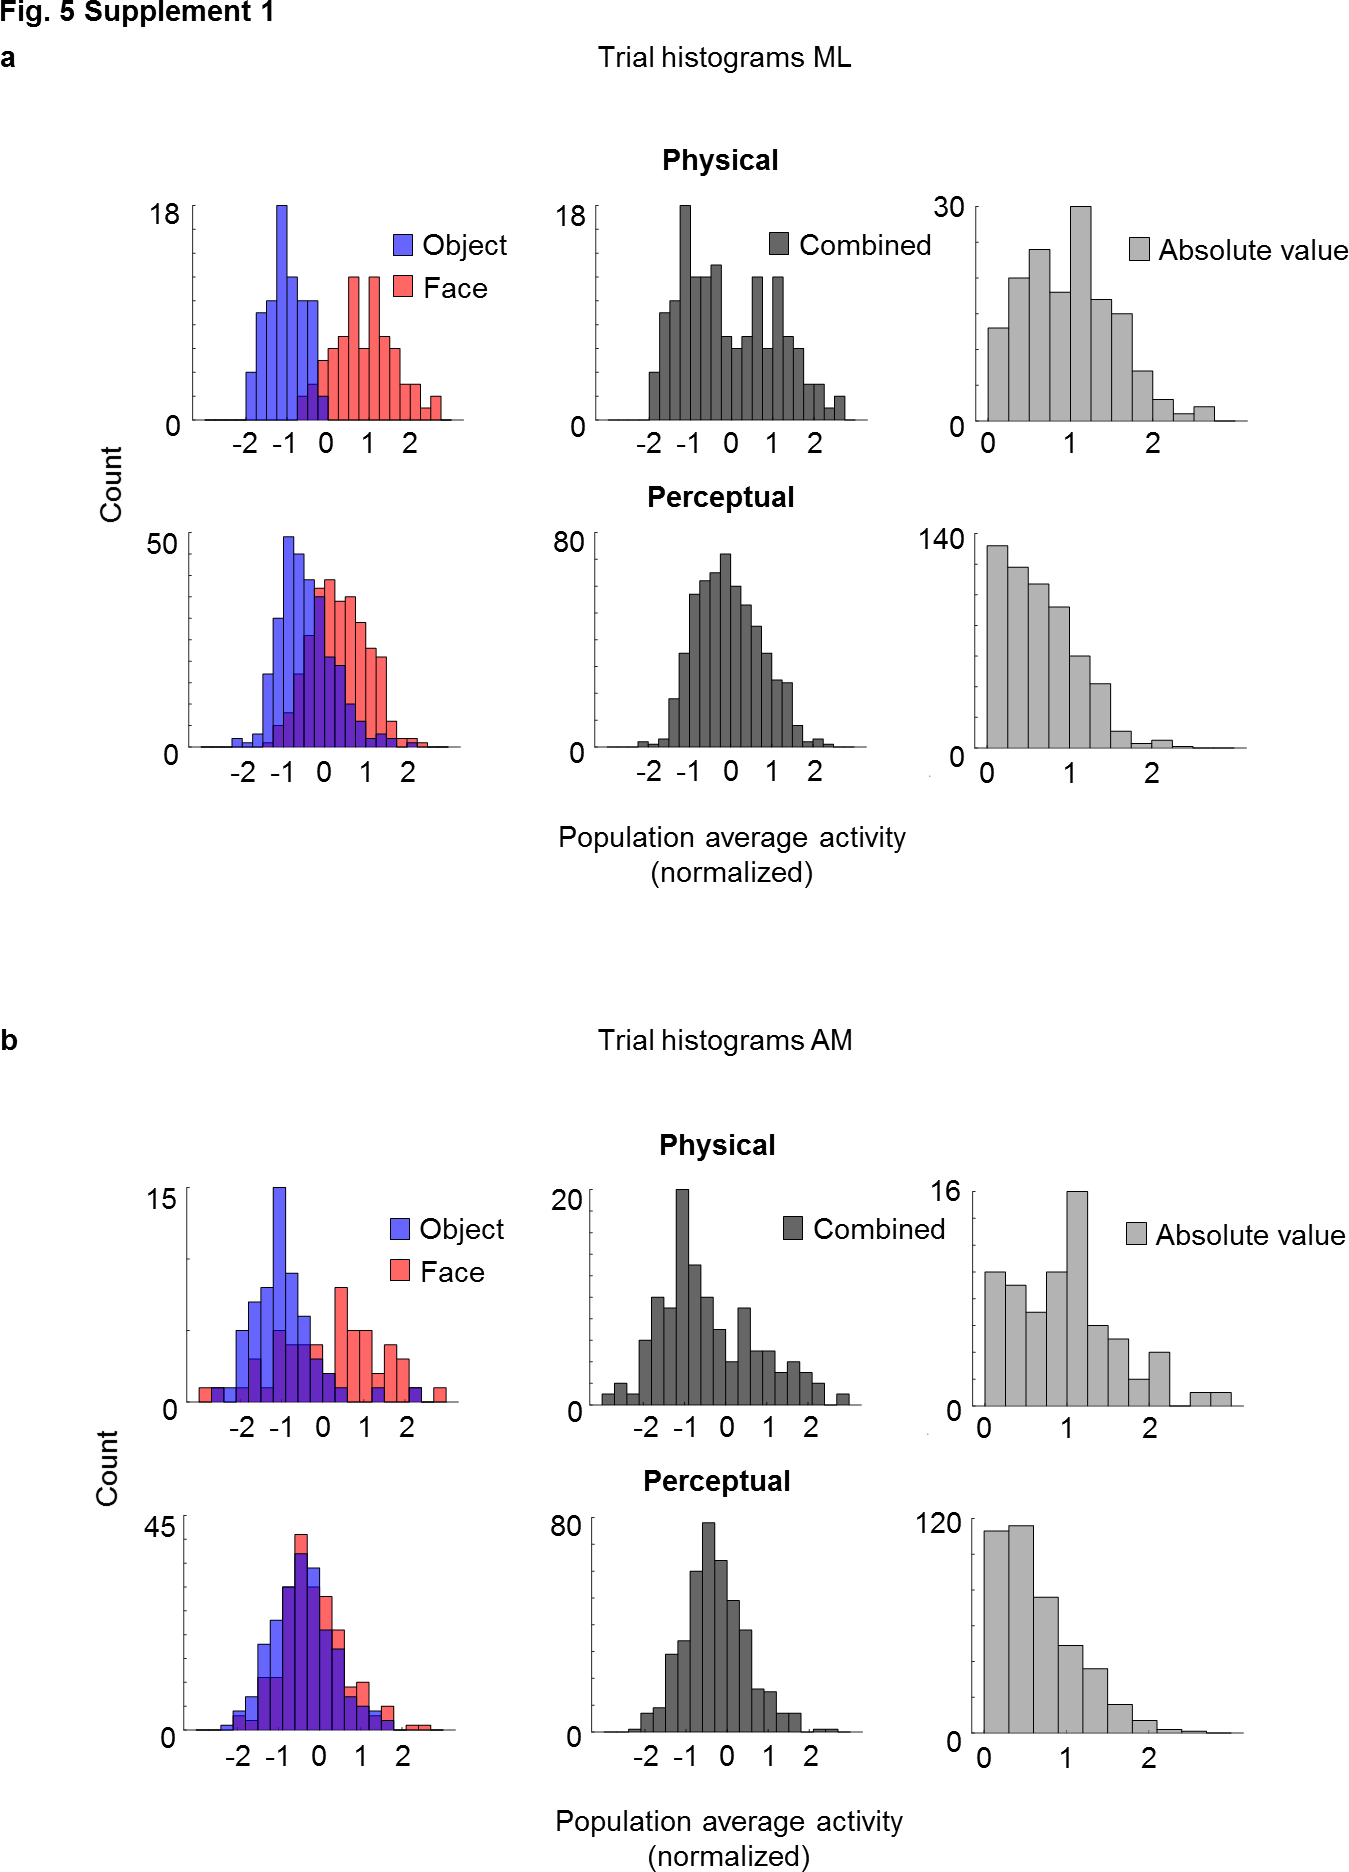

Supplement: supp [file elife-58360-supp-v1.zip › elife_poa_e58360_Figure_5_figure_supplement_1.png]
